# Supplementary material for: Modeling canine hemangiosarcoma progression using patient-derived 2.5D organoids and orthotopic xenografts
Source: Research Square preprint supplement (doi:10.21203/rs.3.rs-8550766/v1), 2026-02-22
Supplement: Supplementary file 1 [file 7aad8999639e604c62f9b0b5.docx]

**
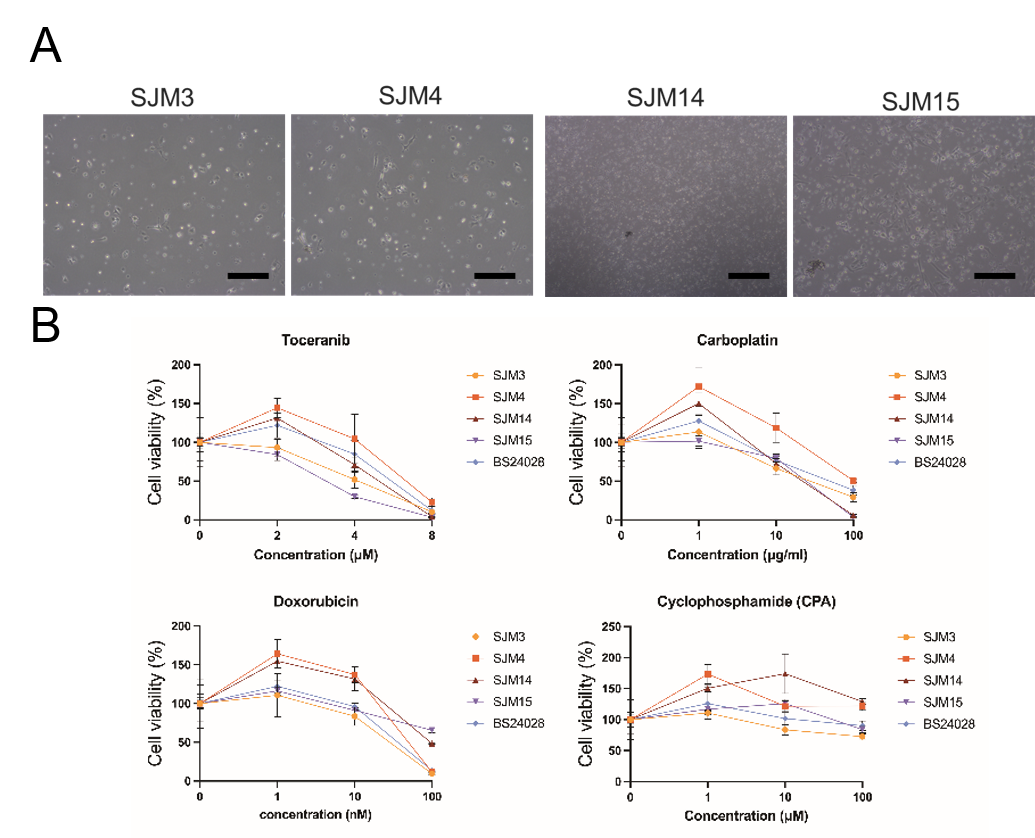
**

**Fig. S1. Bright-field images and drug sensitivity testing of orthotopic xenograft-derived** **hemangiosarcoma (HSA) 2.5D organoids.**

(A) Bright-field images of HSA 2.5D organoids generated directly from orthotopic xenograft tumor tissues. Scale bar = 500 µm. (B) Orthotopic xenograft-derived HSA 2.5D organoids treated with carboplatin, doxorubicin, toceranib, or cyclophosphamide. Cell viability was evaluated via the PrestoBlue™ cell viability assay. Results are expressed as mean ± S.E.M..


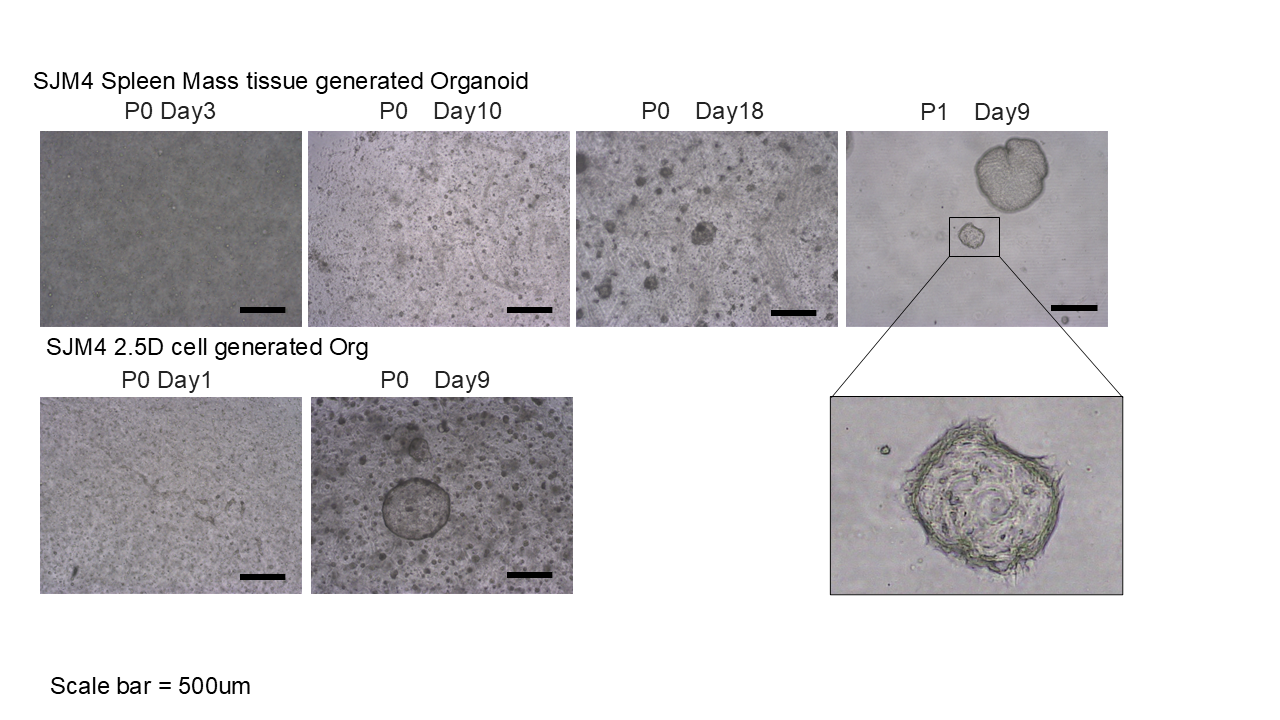


**Fig. S2. Bright field images of HSA 3D organoids.**

Bright-field images of HSA 3D organoids generated directly from orthotopic xenograft tumor tissues and floating 2.5D orthotopic xenograft organoids. Scale bar = 500 µm.
