# Supplementary material for: Modeling canine hemangiosarcoma progression using patient-derived 2.5D organoids and orthotopic xenografts
Source: Research Square preprint supplement (doi:10.21203/rs.3.rs-8550766/v1), 2026-02-22
Supplement: Supplementary file 2 [file cf02f3c6910a917706e682fb.xlsx]

## Sheet: drug list
Supplementary Table 1: List of anti-cancer drugs examined in this study
Cat#	CAS#	Name	Category	Provider
S2409	32981-86-5	10-Deacetylbaccatin-III	Anti-cancer compound	Selleck Chemicals
S1233	362-07-2	2-Methoxyestradiol (2-MeOE2)	Anti-cancer compound	Selleck Chemicals
S2553	5451-09-2	5-Aminolevulinic acid HCl	Anti-cancer compound	Selleck Chemicals
S5716	1231929-97-7	Abemaciclib	Tyrosine kinase inhibitor	Selleck Chemicals
S7158	1231930-82-7	Abemaciclib mesylate	Tyrosine kinase inhibitor	Selleck Chemicals
N6	50-76-0	Actinomycin D	Anti-cancer compound	AdipoGen
S1983	2922-28-3	Adenine HCl	Anti-cancer compound	Selleck Chemicals
S1011	439081-18-2	Afatinib (BIBW2992)	Tyrosine kinase inhibitor	Selleck Chemicals
S7810	850140-73-7	Afatinib (BIBW2992) Dimaleate	Tyrosine kinase inhibitor	Selleck Chemicals
S1630	315-30-0	Allopurinol	Others	Selleck Chemicals
S2814	1217486-61-7	Alpelisib	Tyrosine kinase inhibitor	Selleck Chemicals
S1278	645-05-6	Altretamine	Anti-cancer compound	Selleck Chemicals
S4298	112901-68-5	Amifostine	Others	Selleck Chemicals
S1244	850879-09-3	Amuvatinib (MP-470)	Tyrosine kinase inhibitor	Selleck Chemicals
S1188	120511-73-1	Anastrozole	Anti-cancer compound	Selleck Chemicals
S2221	811803-05-1	Apatinib	Tyrosine kinase inhibitor	Selleck Chemicals
S7724	5291-32-7	APR-246 (PRIMA-1MET)	Anti-cancer compound	Selleck Chemicals
N7	1327-53-3	Arsenic (III) oxide	Anti-cancer compound	Sigma-Aldrich
S2264	71963-77-4	Artemether	Anti-cancer compound	Selleck Chemicals
S3017	50-78-2	Aspirin	Anti-cancer compound	Selleck Chemicals
S1457	229975-97-7	Atazanavir Sulfate	Anti-cancer compound	Selleck Chemicals
S1005	319460-85-0	Axitinib	Tyrosine kinase inhibitor	Selleck Chemicals
S1782	320-67-2	Azacitidine	Anti-cancer compound	Selleck Chemicals
S4194	134-58-7	Azaguanine-8	Anti-cancer compound	Selleck Chemicals
S1835	83905-01-5	Azithromycin	Anti-cancer compound	Selleck Chemicals
S1369	859212-16-1	Bafetinib (INNO-406)	Tyrosine kinase inhibitor	Selleck Chemicals
S1085	414864-00-9	Belinostat (PXD101)	Anti-cancer compound	Selleck Chemicals
S1212	3543-75-7	Bendamustine HCl	Anti-cancer compound	Selleck Chemicals
S3037	190786-44-8	Bepotastine Besilate	Anti-cancer compound	Selleck Chemicals
S4239	484-20-8	Bergapten	Anti-cancer compound	Selleck Chemicals
S3032	130641-38-2	Bindarit	Anti-cancer compound	Selleck Chemicals
S1214	9041-93-4	Bleomycin Sulfate	Anti-cancer compound	Selleck Chemicals
S1013	179324-69-7	Bortezomib (PS-341)	Anti-cancer compound	Selleck Chemicals
S1014	380843-75-4	Bosutinib (SKI-606)	Tyrosine kinase inhibitor	Selleck Chemicals
S1692	55-98-1	Busulfan	Anti-cancer compound	Selleck Chemicals
S1119	849217-68-1	Cabozantinib (XL184, BMS-907351)	Tyrosine kinase inhibitor	Selleck Chemicals
S4001	1140909-48-3	Cabozantinib malate (XL184)	Tyrosine kinase inhibitor	Selleck Chemicals
S2226	870281-82-6	CAL-101 (Idelalisib, GS-1101)	Anti-cancer compound	Selleck Chemicals
S1288	7689-03-4	Camptothecin	Anti-cancer compound	Selleck Chemicals
S1019	267243-28-7	Canertinib (CI-1033)	Tyrosine kinase inhibitor	Selleck Chemicals
S1156	154361-50-9	Capecitabine	Anti-cancer compound	Selleck Chemicals
S2788	1029712-80-8	Capmatinib (INCB28060)	Tyrosine kinase inhibitor	Selleck Chemicals
S3000	51460-26-5	Carbazochrome sodium sulfonate (AC-17)	Anti-cancer compound	Selleck Chemicals
S1215	41575-94-4	Carboplatin	Anti-cancer compound	Selleck Chemicals
S1289	61422-45-5	Carmofur	Anti-cancer compound	Selleck Chemicals
S1017	288383-20-0	Cediranib (AZD2171)	Tyrosine kinase inhibitor	Selleck Chemicals
S1261	16590-42-5	Celecoxib	Others	Selleck Chemicals
S2408	71610-00-9	Cephalomannine	Anti-cancer compound	Selleck Chemicals
S7634	1369761-01-2	Cerdulatinib (PRT062070, PRT2070)	Tyrosine kinase inhibitor	Selleck Chemicals
S7083	1032900-25-6	Ceritinib (LDK378)	Tyrosine kinase inhibitor	Selleck Chemicals
S4288	305-03-3	Chloroambucil	Anti-cancer compound	Selleck Chemicals
S1166	15663-27-1	Cisplatin	Anti-cancer compound	Selleck Chemicals
S1199	4291-63-8	Cladribine	Anti-cancer compound	Selleck Chemicals
S1218	123318-82-1	Clofarabine	Anti-cancer compound	Selleck Chemicals
S2561	50-41-9	Clomifene citrate	Anti-cancer compound	Selleck Chemicals
S2613	60200-06-8	Clorsulon	Anti-cancer compound	Selleck Chemicals
S2900	1004316-88-4	Cobicistat (GS-9350)	Anti-cancer compound	Selleck Chemicals
N12	18080-67-6	Conoidin A	Anti-cancer compound	Cayman chemical
S2559	50-04-4	Cortisone acetate	Anti-cancer compound	Selleck Chemicals
S2730	670220-88-9	Crenolanib (CP-868596)	Tyrosine kinase inhibitor	Selleck Chemicals
S1068	877399-52-5	Crizotinib (PF-02341066)	Tyrosine kinase inhibitor	Selleck Chemicals
S2057	6055-19-2	Cyclophosphamide Monohydrate	Anti-cancer compound	Selleck Chemicals
N8	69-74-9	Cytosine β-D-arabinofuranoside hydrochloride	Anti-cancer compound	Sigma-Aldrich
S1221	4342-03-4	Dacarbazine	Standard chemotherapy reagent	Selleck Chemicals
S2727	1110813-31-4	Dacomitinib (PF299804, PF299)	Tyrosine kinase inhibitor	Selleck Chemicals
S2215	208255-80-5	DAPT (GSI-IX)	Anti-cancer compound	Selleck Chemicals
S1021	302962-49-8	Dasatinib	Tyrosine kinase inhibitor	Selleck Chemicals
S7782	863127-77-9	Dasatinib Monohydrate	Tyrosine kinase inhibitor	Selleck Chemicals
S3035	23541-50-6	Daunorubicin HCl	Anti-cancer compound	Selleck Chemicals
S1200	2353-33-5	Decitabine	Anti-cancer compound	Selleck Chemicals
S5651	24584-09-6	Dexrazoxane	Others	Selleck Chemicals
S1859	56-53-1	Diethylstilbestrol	Anti-cancer compound	Selleck Chemicals
S1148	114977-28-5	Docetaxel	Standard chemotherapy reagent	Selleck Chemicals
S1208	25316-40-9	Doxorubicin (Adriamycin)	Standard chemotherapy reagent	Selleck Chemicals
S2229	496775-61-2	Eltrombopag Olamine	Anti-cancer compound	Selleck Chemicals
S7523	1108743-60-7	Entospletinib (GS-9973)	Tyrosine kinase inhibitor	Selleck Chemicals
S7998	1108743-60-7	Entrectinib (RXDX-101)	Tyrosine kinase inhibitor	Selleck Chemicals
S1250	915087-33-1	Enzalutamide (MDV3100)	Anti-cancer compound	Selleck Chemicals
S2521	51-42-3	Epinephrine Bitartrate	Anti-cancer compound	Selleck Chemicals
S1223	56390-09-1	Epirubicin HCl	Anti-cancer compound	Selleck Chemicals
S8401	1346242-81-6	Erdafitinib	Tyrosine kinase inhibitor	Selleck Chemicals
eisai1	441045-17-6	Eribulin	Anti-cancer compound	Eisai
S7786	183321-74-6	Erlotinib	Tyrosine kinase inhibitor	Selleck Chemicals
S1023	183319-69-9	Erlotinib HCl (OSI-744)	Tyrosine kinase inhibitor	Selleck Chemicals
S2233	161796-78-7	Esomeprazole Sodium	Anti-cancer compound	Selleck Chemicals
N2	52205-73-9	Estramustin sodium phosphate	Anti-cancer compound	Sigma-Aldrich
S1225	33419-42-0	Etoposide	Anti-cancer compound	Selleck Chemicals
S1120	159351-69-6	Everolimus (RAD001)	Anti-cancer compound	Selleck Chemicals
S1196	107868-30-4	Exemestane	Anti-cancer compound	Selleck Chemicals
S2467	104227-87-4	Famciclovir	Anti-cancer compound	Selleck Chemicals
S7605	1206161-97-8	Filgotinib (GLPG0634)	Tyrosine kinase inhibitor	Selleck Chemicals
S1299	50-91-9	Floxuridine	Anti-cancer compound	Selleck Chemicals
S1491	21679-14-1	Fludarabine	Anti-cancer compound	Selleck Chemicals
S1229	75607-67-9	Fludarabine Phosphate	Anti-cancer compound	Selleck Chemicals
S2030	30484-77-6	Flunarizine 2HCl	Anti-cancer compound	Selleck Chemicals
S1209	51-21-8	Fluorouracil (5-Fluoracil, 5-FU)	Anti-cancer compound	Selleck Chemicals
S1908	13311-84-7	Flutamide	Anti-cancer compound	Selleck Chemicals
S1111	849217-64-7	Foretinib (GSK1363089)	Tyrosine kinase inhibitor	Selleck Chemicals
S2625	901119-35-5	Fostamatinib (R788)	Tyrosine kinase inhibitor	Selleck Chemicals
S1191	129453-61-8	Fulvestrant	Anti-cancer compound	Selleck Chemicals
S1025	184475-35-2	Gefitinib (ZD1839)	Tyrosine kinase inhibitor	Selleck Chemicals
S1714	95058-81-4	Gemcitabine	Standard chemotherapy reagent	Selleck Chemicals
S1149	122111-03-9	Gemcitabine HCl	Standard chemotherapy reagent	Selleck Chemicals
S2413	27741-01-1	Geniposidic acid	Anti-cancer compound	Selleck Chemicals
S1342	446-72-0	Genistein	Tyrosine kinase inhibitor	Selleck Chemicals
S9015	26833-87-4	Homoharringtonine	Anti-cancer compound	Selleck Chemicals
S1896	127-07-1	Hydroxyurea	Anti-cancer compound	Selleck Chemicals
S2680	936563-96-1	Ibrutinib (PCI-32765)	Tyrosine kinase inhibitor	Selleck Chemicals
S1228	57852-57-0	Idarubicin HCl	Anti-cancer compound	Selleck Chemicals
S1302	3778-73-2	Ifosfamide	Standard chemotherapy reagent	Selleck Chemicals
S2475	152459-95-5	Imatinib (STI571)	Tyrosine kinase inhibitor	Selleck Chemicals
S1026	220127-57-1	Imatinib Mesylate (STI571)	Tyrosine kinase inhibitor	Selleck Chemicals
S2217	136572-09-3	Irinotecan HCl Trihydrate	Anti-cancer compound	Selleck Chemicals
S2476	84625-61-6	Itraconazole	Anti-cancer compound	Selleck Chemicals
S7930	219989-84-1	Ixabepilone (BMS-247550)	Anti-cancer compound	Selleck Chemicals
S3024	84057-84-1	Lamotrigine	Anti-cancer compound	Selleck Chemicals
S2111	231277-92-2	Lapatinib	Tyrosine kinase inhibitor	Selleck Chemicals
S1028	388082-77-7	Lapatinib (GW-572016) Ditosylate	Tyrosine kinase inhibitor	Selleck Chemicals
S1029	191732-72-6	Lenalidomide	Anti-cancer compound	Selleck Chemicals
S1164	417716-92-8	Lenvatinib (E7080)	Tyrosine kinase inhibitor	Selleck Chemicals
S1235	112809-51-5	Letrozole	Anti-cancer compound	Selleck Chemicals
S3031	668270-12-0	Linagliptin	Anti-cancer compound	Selleck Chemicals
S2479	859-18-7	Lincomycin HCl	Anti-cancer compound	Selleck Chemicals
S1003	796967-16-3	Linifanib (ABT-869)	Tyrosine kinase inhibitor	Selleck Chemicals
S1091	867160-71-2	Linsitinib (OSI-906)	Tyrosine kinase inhibitor	Selleck Chemicals
S1840	13010-47-4	Lomustine	Anti-cancer compound	Selleck Chemicals
S1304	595-33-5	Megestrol Acetate	Anti-cancer compound	Selleck Chemicals
S1305	50-44-2	Mercaptopurine (6-MP)	Anti-cancer compound	Selleck Chemicals
S1735	19767-45-4	Mesna	Others	Selleck Chemicals
S2527	3963-95-9	Methacycline HCl	Anti-cancer compound	Selleck Chemicals
S1210	59-05-2	Methotrexate	Anti-cancer compound	Selleck Chemicals
S1952	298-81-7	Methoxsalen	Anti-cancer compound	Selleck Chemicals
S4009	223673-61-8	Mirabegron	Anti-cancer compound	Selleck Chemicals
N11	18378-89-7	Mithramycin A	Anti-cancer compound	Abcam
S8146	50-07-7	Mitomycin C	Anti-cancer compound	Selleck Chemicals
S1732	53-19-0	Mitotane	Anti-cancer compound	Selleck Chemicals
S2485	70476-82-3	Mitoxantrone 2HCl	Anti-cancer compound	Selleck Chemicals
S2486	3160-91-6	Moroxydine HCl	Anti-cancer compound	Selleck Chemicals
S2216	366017-09-6	Mubritinib (TAK 165)	Tyrosine kinase inhibitor	Selleck Chemicals
S3066	357-08-4	Naloxone HCl	Anti-cancer compound	Selleck Chemicals
S1213	121032-29-9	Nelarabine	Anti-cancer compound	Selleck Chemicals
S1033	641571-10-0	Nilotinib (AMN-107)	Tyrosine kinase inhibitor	Selleck Chemicals
S2721	75530-68-6	Nilvadipine	Anti-cancer compound	Selleck Chemicals
S1010	656247-17-5	Nintedanib (BIBF 1120)	Tyrosine kinase inhibitor	Selleck Chemicals
S4363	912-60-7	Noscapine HCl	Anti-cancer compound	Selleck Chemicals
S1061	890090-75-2	Nutlin-3	Anti-cancer compound	Selleck Chemicals
S2183	872511-34-7	NVP-BGJ398	Tyrosine kinase inhibitor	Selleck Chemicals
S1060	763113-22-0	Olaparib (AZD2281, Ku-0059436)	Anti-cancer compound	Selleck Chemicals
S1470	252916-29-3	Orantinib (TSU-68, SU6668)	Tyrosine kinase inhibitor	Selleck Chemicals
S2205	183320-51-6	OSI-420	Anti-cancer compound	Selleck Chemicals
S7297	1421373-65-0	Osimertinib (AZD9291)	Tyrosine kinase inhibitor	Selleck Chemicals
S1224	61825-94-3	Oxaliplatin	Anti-cancer compound	Selleck Chemicals
S1150	33069-62-4	Paclitaxel	Anti-cancer compound	Selleck Chemicals
S2410	23180-57-6	Paeoniflorin	Anti-cancer compound	Selleck Chemicals
S1116	827022-32-2	Palbociclib (PD-0332991) HCl	Tyrosine kinase inhibitor	Selleck Chemicals
S1579	827022-33-3	Palbociclib (PD0332991) Isethionate	Tyrosine kinase inhibitor	Selleck Chemicals
S1035	635702-64-6	Pazopanib HCl (GW786034)	Tyrosine kinase inhibitor/standard chemotherapeutic reagent	Selleck Chemicals
S7785	357166-30-4	Pemetrexed Disodium Hydrate	Anti-cancer compound	Selleck Chemicals
S7818	1029044-16-3	Pexidartinib (PLX3397)	Tyrosine kinase inhibitor	Selleck Chemicals
S1654	50-33-9	Phenylbutazone	Anti-cancer compound	Selleck Chemicals
S5004	137071-32-0	Pimecrolimus	Anti-cancer compound	Selleck Chemicals
S2590	111025-46-8	Pioglitazone	Others	Selleck Chemicals
N14	54-91-1	Pipobroman-D8	Anti-cancer compound	MCE
S1567	19171-19-8	Pomalidomide	Anti-cancer compound	Selleck Chemicals
S1490	943319-70-8	Ponatinib (AP24534)	Tyrosine kinase inhibitor	Selleck Chemicals
S7358	1092364-38-9	Poziotinib (HM781-36B)	Tyrosine kinase inhibitor	Selleck Chemicals
S1497	146464-95-1	Pralatrexate	Others	Selleck Chemicals
S7723	5608-24-2	PRIMA-1	Anti-cancer compound	Selleck Chemicals
S1995	366-70-1	Procarbazine HCl	Anti-cancer compound	Selleck Chemicals
S1526	950769-58-1	Quizartinib (AC220)	Others	Selleck Chemicals
S1227	82640-04-8	Raloxifene HCl	Others	Selleck Chemicals
S1178	755037-03-7	Regorafenib (BAY 73-4506)	Tyrosine kinase inhibitor	Selleck Chemicals
S7030	939981-39-2	RG-7112	Tyrosine kinase inhibitor	Selleck Chemicals
S7284	1374640-70-6	Rociletinib (CO-1686, AVL-301)	Tyrosine kinase inhibitor	Selleck Chemicals
S3020	128517-07-7	Romidepsin (FK228, Depsipeptide)	Anti-cancer compound	Selleck Chemicals
S2556	122320-73-4	Rosiglitazone	Anti-cancer compound	Selleck Chemicals
S1378	941678-49-5	Ruxolitinib (INCB018424)	Tyrosine kinase inhibitor	Selleck Chemicals
S1006	379231-04-6	Saracatinib (AZD0530)	Tyrosine kinase inhibitor	Selleck Chemicals
S7397	284461-73-0	Sorafenib	Anti-cancer compound	Selleck Chemicals
S1040	475207-59-1	Sorafenib Tosylate	Anti-cancer compound	Selleck Chemicals
S1312	18883-66-4	Streptozotocin (STZ)	Anti-cancer compound	Selleck Chemicals
S2007	38194-50-2	Sulindac	Anti-cancer compound	Selleck Chemicals
S7781	557795-19-4	Sunitinib	Tyrosine kinase inhibitor	Selleck Chemicals
S1042	341031-54-7	Sunitinib Malate	Tyrosine kinase inhibitor	Selleck Chemicals
S5003	104987-11-3	Tacrolimus (FK506)	Anti-cancer compound	Selleck Chemicals
S1108	761439-42-3	TAE684 (NVP-TAE684)	Tyrosine kinase inhibitor	Selleck Chemicals
S2225	901-47-3	TAME	Anti-cancer compound	Selleck Chemicals
S1300	17902-23-7	Tegafur (FT-207, NSC 148958)	Anti-cancer compound	Selleck Chemicals
S2099	110221-44-8	Temocapril HCl	Anti-cancer compound	Selleck Chemicals
S1237	85622-93-1	Temozolomide	Anti-cancer compound	Selleck Chemicals
S1044	162635-04-3	Temsirolimus (CCI-779, NSC 683864)	Anti-cancer compound	Selleck Chemicals
S1787	29767-20-2	Teniposide	Anti-cancer compound	Selleck Chemicals
S1193	50-35-1	Thalidomide	Others	Selleck Chemicals
S1774	154-42-7	Thioguanine	Anti-cancer compound	Selleck Chemicals
S2753	905854-02-6	Tivantinib (ARQ 197)	Tyrosine kinase inhibitor	Selleck Chemicals
S1207	475108-18-0	Tivozanib (AV-951)	Tyrosine kinase inhibitor	Selleck Chemicals
S5001	540737-29-9	Tofacitinib (CP-690550) Citrate	Tyrosine kinase inhibitor	Selleck Chemicals
S2443	64-77-7	Tolbutamide	Anti-cancer compound	Selleck Chemicals
S2058	2398-96-1	Tolnaftate	Anti-cancer compound	Selleck Chemicals
S1231	119413-54-6	Topotecan HCl	Anti-cancer compound	Selleck Chemicals
HY-50936	114899-77-3	Trabectedin	Anti-cancer compound	MedChemExpress
S1439	53902-12-8	Tranilast	Others	Selleck Chemicals
S4736	15421-84-8	Trapidil	Others	Selleck Chemicals
S1653	302-79-4	Tretinoin	Anti-cancer compound	Selleck Chemicals
S7342	1493694-70-4	UNC2250	Tyrosine kinase inhibitor	Selleck Chemicals
S1046	443913-73-3	Vandetanib (ZD6474)	Tyrosine kinase inhibitor	Selleck Chemicals
S1101	212141-51-0	Vatalanib (PTK787) 2HCl	Tyrosine kinase inhibitor	Selleck Chemicals
S1267	918504-65-1	Vemurafenib (PLX4032, RG7204)	Anti-cancer compound	Selleck Chemicals
S4505	143-67-9	Vinblastine sulfate	Anti-cancer compound	Selleck Chemicals
S1241	2068-78-2	Vincristine	Anti-cancer compound	Selleck Chemicals
S1082	879085-55-9	Vismodegib (GDC-0449)	Anti-cancer compound	Selleck Chemicals
S1047	149647-78-9	Vorinostat (SAHA, MK0683)	Anti-cancer compound	Selleck Chemicals
S1118	956958-53-5	XL147 analog	Tyrosine kinase inhibitor	Selleck Chemicals
S1314	118072-93-8	Zoledronic Acid	Others	Selleck Chemicals
